# Supplementary material
Source: Springer Nature journal article supplement (https://www.springermedizin.de/resource/supplementary/12916_2006_96_MOESM8_ESM.pdf/9599160)
Supplement: MOESM8 [file 9599160]

## Control graph

Premature births by country of birth of mother,  
NSW 1994 to 1998

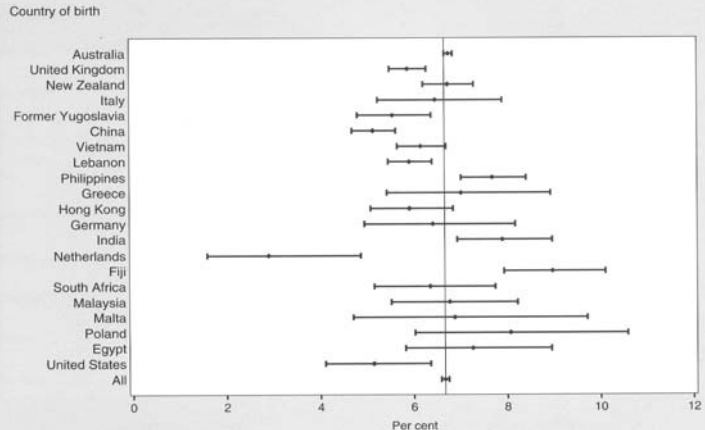

## Intervention graph

Premature births by country of birth of mother,  
NSW 1994 to 1998

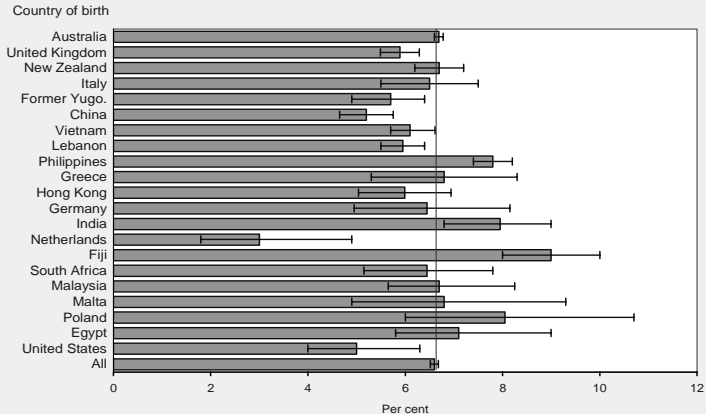

Note: Births where gestational age was less than 37 weeks were classified as premature births. Infants of at least 400 grams birth weight or at least 20 weeks gestation were included. Upper and lower limits of the 95 per cent confidence interval for the point estimate are shown.

Source: NSW Midwives Data Collection (HOIST). Epidemiology and Surveillance Branch, NSW Health Department.

Note: Confidence intervals indicate statistical uncertainty about each value on the graph. Longer intervals mean more uncertainty. When two intervals overlap then there is more uncertainty that the two groups are really different. Births where gestational age was less than 37 weeks were classified as premature births. Infants of at least 400 grams birth weight or at least 20 weeks gestation were included.

Source: NSW Midwives Data Collection (HOIST). Epidemiology and Surveillance Branch, NSW Health Department
